# Supplementary material for: Using Slit-Lamp Images for Deep Learning-Based Identification of Bacterial and Fungal Keratitis: Model Development and Validation with Different Convolutional Neural Networks
Source: MDPI journal article supplement (doi:10.3390/diagnostics11071246), 2021-07-12
Supplement: s1 [file s1]

## Using Slit-Lamp Images for Deep Learning-Based Identification of Bacterial and Fungal Keratitis: Model Development and Validation with Different Convolutional Neural Networks

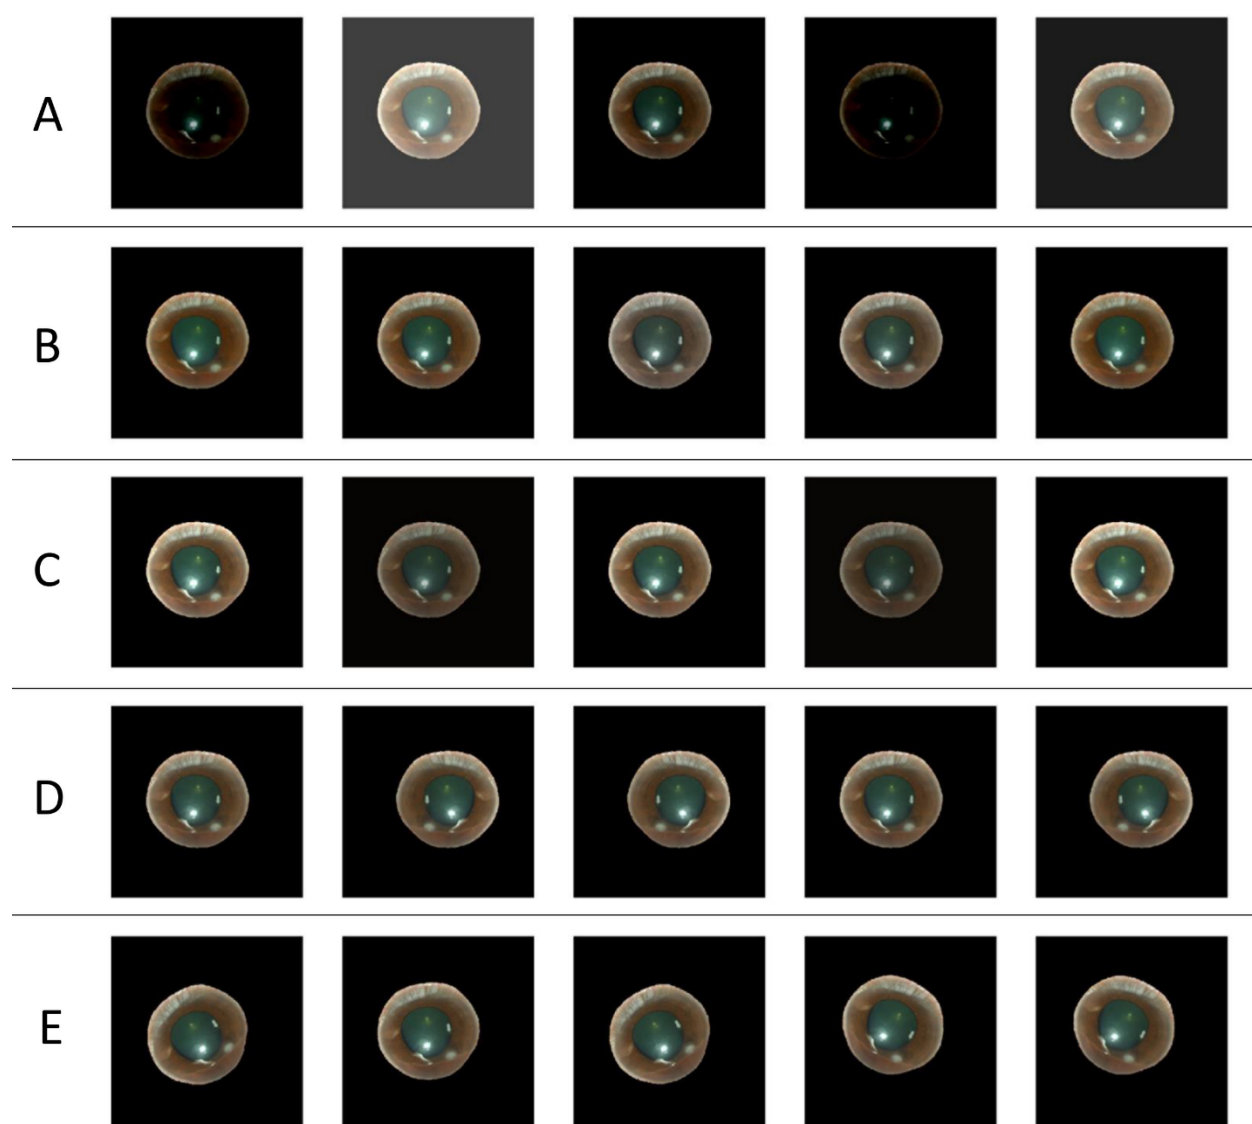

**Figure S1.** Examples of cropped corneal images processed through augmentation, including (A) brightness adjustment, (B) saturation adjustment, (C) contrast adjustment, (D) horizontal flipping, and (E) rotation.
